# Supplementary material
Source: PubMed Central journal article supplement (PMC7261815)
Supplement: 159237_0_supp_484984_q6kf1v.pdf [file 159237_0_supp_484984_q6kf1v.pdf]

## SUPPLEMENTAL FIGURE LEGENDS

### **Figure S1. Pearson correlation of the identified peptides between UN and KO cell clones.**

Pairwise comparisons of the ion peak intensities corresponding to the assigned peptides from UN and KO cell clones of HLA-B\*27:05 ligands. Pearson correlation values are indicated.

### **Figure S2. Venn diagram for the identified HLA-B\*25:05 ligands.**

Numbers of peptides identified in different UN and KO cell clones are indicated. Overlapping sections show the peptides identified in more than one cell clone.

### **Figure S3. Theoretical affinity to HLA-B\*27:05 ligands that were detected by MS/MS analysis.**

Theoretical affinity of identified peptides from UN and KO cell clones. The medians are indicated as continuous red lines.

### **Figure S4. Hydrophobicity of HLA-B\*27:05 ligands from ERAP2-positive (UN) and ERAP2-negative (KO) cell clones.**

Comparison of hydrophobicity measured on the grand average of hydrophobicity (GRAVY) scale (ProtParam tool, ExPASy Proteomics Server, <http://www.expasy.ch>) at the indicated position among the HLA-B\*27:05 ligands with IR > 1.5 from UN (open bars) and KO (closed bars) cell clones. Significant P values: \*, P < 0.05; \*\*, P < 0.01; and \*\*\*, P < 0.001 between UN and KO cell clones are indicated, respectively.
