# Supplementary material
Source: PubMed Central journal article supplement (PMC7261815)

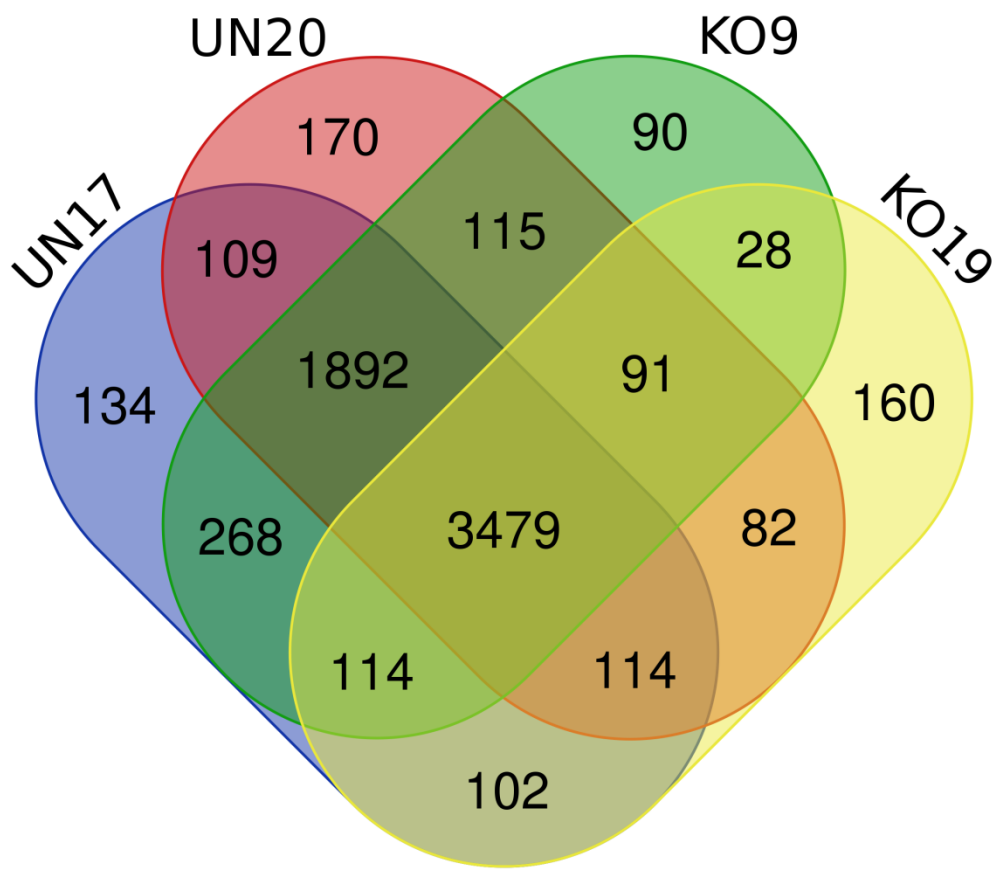

Figure S2

Supplement: 159237_0_supp_484989_q6k11k.pdf [file 159237_0_supp_484989_q6k11k.pdf]

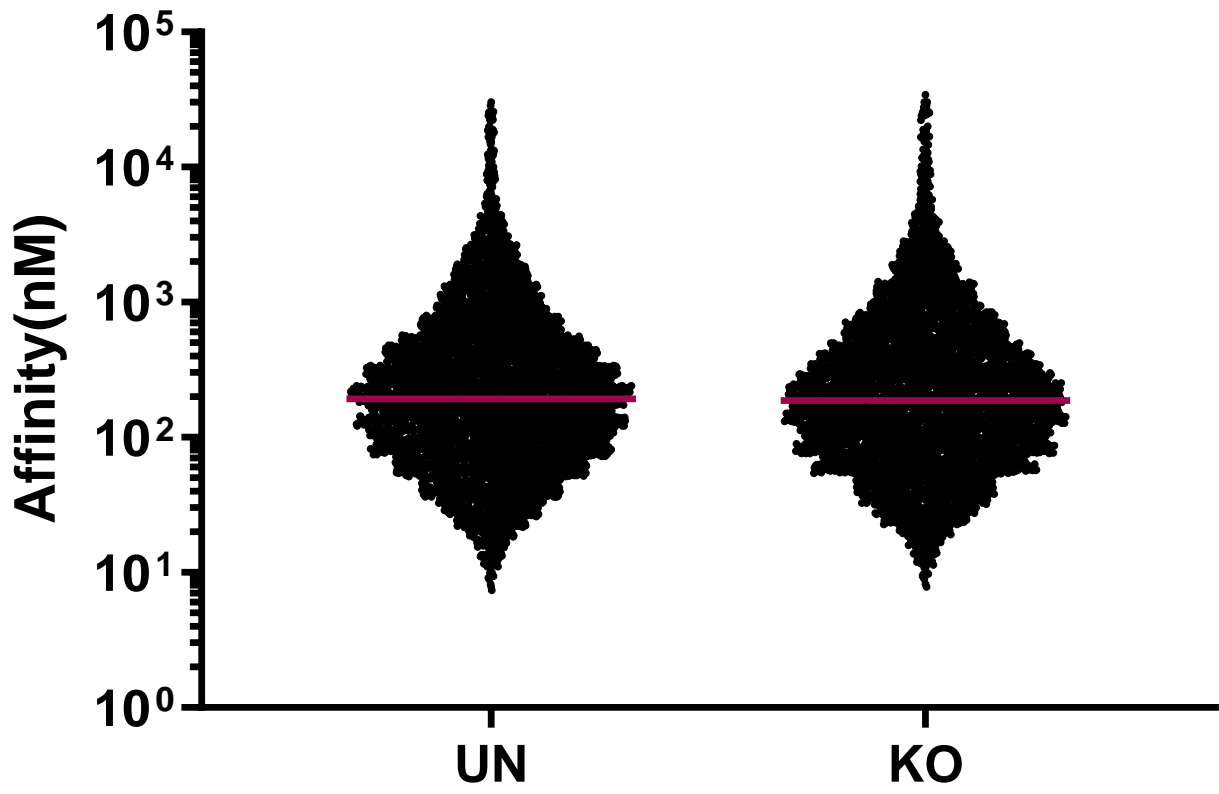

Figure S3

Supplement: 159237_0_supp_484990_q6kq1k.pdf [file 159237_0_supp_484990_q6kq1k.pdf]

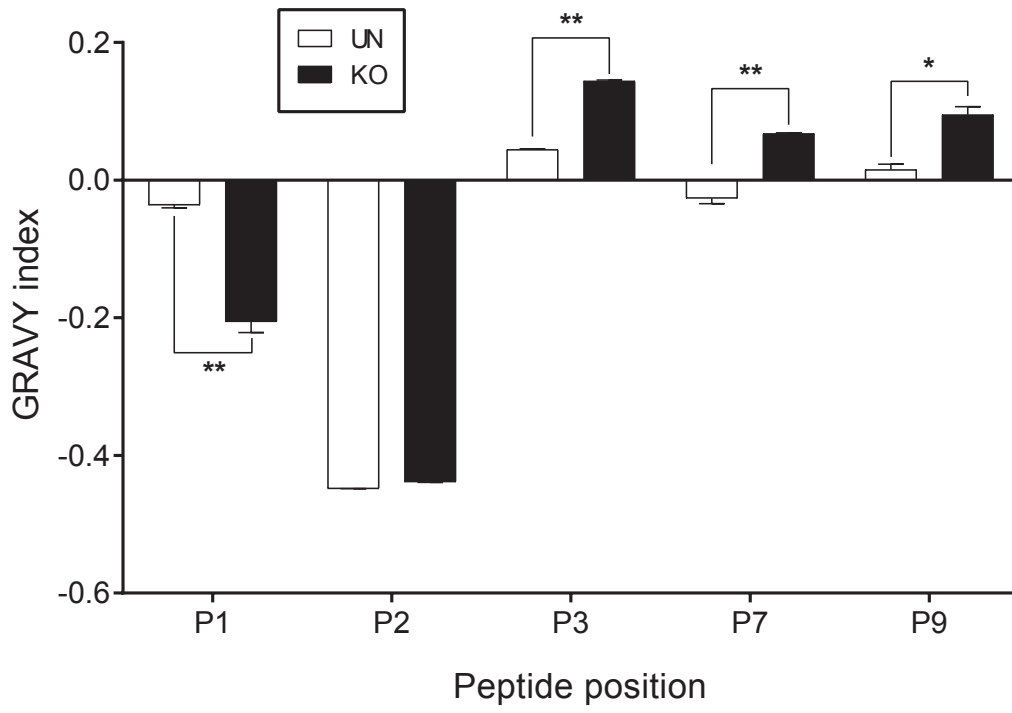

Figure 5

Supplement: 159237_0_supp_484999_q6kf1j.pdf [file 159237_0_supp_484999_q6kf1j.pdf]
